# Supplementary material for: Sa-SNN: spiking attention neural network for image classification
Source: PeerJ journal article supplement (doi:10.7717/peerj-cs.2549), 2024-11-25
Supplement: CodeDocumentation.docx [file CodeDocumentation.docx]

**SA-SNN_document**

Sa-SNN: Spiking Attention Neural Network for Image Classification

**Requirements**

- Python3
- PyTorch
- SnnTorch
- NumPy
- MNIST Dataset

URL:https://www.kaggle.com/datasets/hojjatk/mnist-dataset

- Fashion-MNIST dataset

URL:https://www.kaggle.com/datasets/zalando-research/fashionmnist

- N-MNIST

URL:https://www.garrickorchard.com/datasets/n-mnist

**Scripts**

**model.py**

A script for defining the SECA attention mechanism and new residual structure proposed in this design

**train.py**

A script for testing the results of this design
